# Supplementary material for: Extracellular vesicles promotes liver metastasis of lung cancer by ALAHM increasing hepatocellular secretion of HGF
Source: PubMed Central journal article supplement — iScience. 2022 Feb 24;25(3):103984. doi: 10.1016/j.isci.2022.103984 (PMC8914534; doi:10.1016/j.isci.2022.103984), 2022-02-24

iScience, Volume 25

**Supplemental information**

**Extracellular vesicles promotes liver  
metastasis of lung cancer by ALAHM  
increasing hepatocellular secretion of HGF**

**Chunyang Jiang, Xu Li, Bingsheng Sun, Na Zhang, Jing Li, Shijing Yue, and Xiaoli Hu**

**Figure S1 TEM detection of EVs which were isolated from HPAEpiC and NCI-H1975 cells, related to Figure 2**

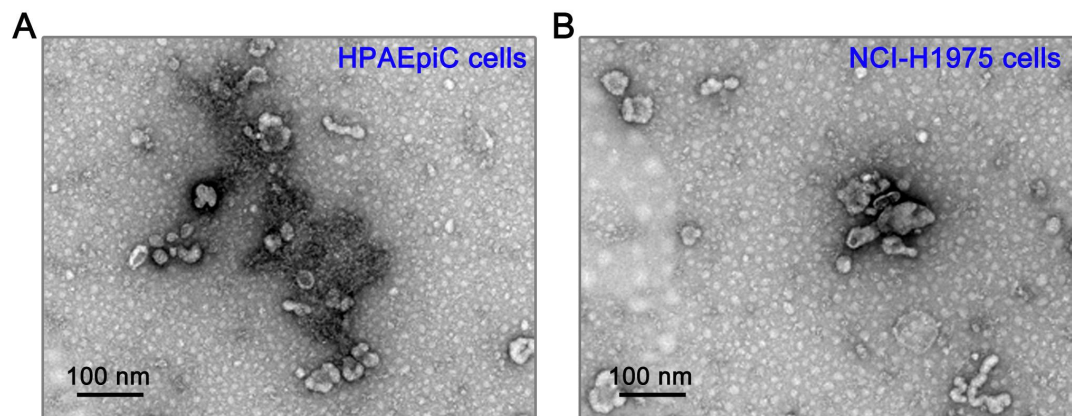

Supplement: mmc1.pdf [file mmc1.pdf]
